# Supplementary material for: A magnetically recoverable γ-Fe2O3nanocatalyst for the synthesis of 2-phenylquinazolines under solvent-free conditions
Source: Royal Society of Chemistry journal article supplement (doi:10.1039/c1cy00341k), 2011-12-06
Supplement: c1cy00341k.pdf [file c1cy00341k.pdf]

## Supporting information

### **Magnetically recoverable $\gamma$ -Fe<sub>2</sub>O<sub>3</sub> nanocatalyst for the synthesis of 2-phenylquinazolines under solvent free conditions**

**Narani Anand<sup>a</sup>, Kannapu Hari Prasad Reddy<sup>a</sup>, Tirumalasetty Satyanarayana<sup>b</sup>, Kamaraju Seetha Rama Rao<sup>a</sup>, David Raju Burri<sup>\*a</sup>**

<sup>a</sup> Catalysis Laboratory, Indian Institute of Chemical Technology, Hyderabad-500607, INDIA.  
Fax: +91-40-27160921; Tel: +91-40-27191712  
E-mail: [david@iict.res.in](mailto:david@iict.res.in)

<sup>b</sup> Department of Chemistry, PG College, Osmania University, Mirzapur-502249, INDIA.  
Tel : +91-8541-285762, [E-mail: tirumalasettysatya@gmail.com](mailto:tirumalasettysatya@gmail.com)

| <b>Table of Contents</b>                                      | <b>Pages</b> |
|---------------------------------------------------------------|--------------|
| <b>General information</b>                                    | <b>2</b>     |
| <b>Characterization data of 2-phenylquinazoline compounds</b> | <b>2-7</b>   |
| <b>References</b>                                             | <b>7</b>     |

## General information

All chemicals were purchased from Sigma Aldrich. Analytical TLC was performed by using silica gel 60 F254 pre-coated plates and the products were visualized by UV lamp. All products were characterized by  $^1\text{H}$  &  $^{13}\text{C}$  NMR spectra.  $^1\text{H}$  NMR and  $^{13}\text{C}$  NMR recorded on 200 or 300 MHz and 75 MHz in  $\text{CDCl}_3$ . Chemical shifts were reported in parts per million (ppm,  $\delta$ ) using TMS as the internal standard downfield from the tetramethylsilane

## Characterization data of 2-phenylquinazoline compounds

### *4-methyl-2-phenylquinazoline* (Table 3, Entry 1) <sup>1</sup>

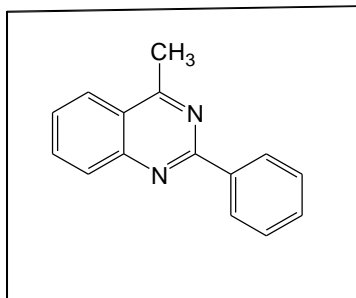

m.p. 72-76 °C.  $^1\text{H}$  NMR (300MHz,  $\text{CDCl}_3$ , TMS)  $\delta$  (ppm) 2.99 (s, 3H), 7.50-7.59 (m, 4H), 7.85 (t,  $J = 8.3$ , 1H), 8.07 (d,  $J = 8.3$  Hz, 2H), 8.60--8.63 (m, 2H).  $^{13}\text{C}$  NMR (75MHz  $\text{CDCl}_3$ , TMS)  $\delta$  (ppm) 21.7, 122.7, 123.6, 124.9, 126.7, 128.2, 128.2, 129.3, 130.3, 133.0, 138.2, 139.1, 150.1, 160.2, 168.1 ppm.

### *2-(4-methoxyphenyl)-4-methylquinazoline* (Table 3, Entry 2) <sup>1</sup>

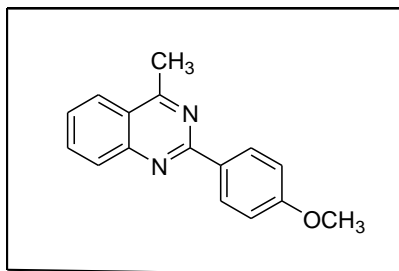

m.p.  $^1\text{H}$  NMR (300MHz,  $\text{CDCl}_3$ , TMS)  $\delta$  (ppm) 2.95 (s, 3H), 3.85 (s, 3H), 6.96 (d,  $J = 9.1$  Hz, 1H), 7.19 (t,  $J = 8$  Hz, 2H), 7.63 (d,  $J = 8.3$ , 2H), 7.78 (t,  $J = 8.3$  Hz, 1H), 7.97 (d,  $J = 8.3$  Hz, 2H).  $^{13}\text{C}$  NMR (75MHz  $\text{CDCl}_3$ , TMS)  $\delta$  (ppm) 21.7, 55.0, 113.5, 115.2, 122.5, 124.7, 126.0, 128.8, 130.7, 131.7, 133.1, 134.0, 150.3, 159.5, 161.8, 166.9

**2-(4-fluorophenyl)-4-methylquinazoline** (Table 3, Entry 3) <sup>1</sup>

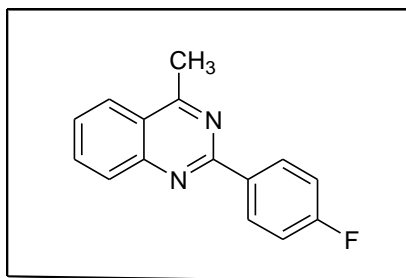

m.p.  $^1\text{H}$  NMR (300MHz,  $\text{CDCl}_3$ , TMS)  $\delta$  (ppm) 2.89 (s, 3H), 7.40-7.48 (m, 3H), 7.77-7.82 (m, 1H), 7.92-7.96 (m, 2H), 8.51 (d,  $J = 8.2$  Hz, 2H),  $^{13}\text{C}$  NMR (75MHz  $\text{CDCl}_3$ , TMS)  $\delta$  (ppm) 21.7, 122.5, 124.1, 124.7, 126.8, 128.3, 129.0, 130.0, 133.2, 136.6, 136.9, 150.5, 158.9, 161.2, 168.0 .

**2-(4-chlorophenyl)-4-methylquinazoline** (Table 3, Entry 4) <sup>1</sup>

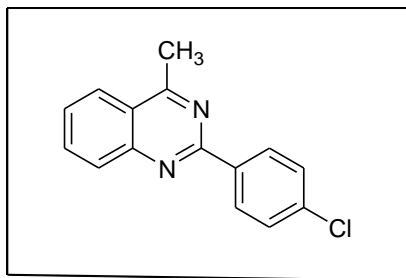

m.p.  $^1\text{H}$  NMR (300MHz,  $\text{CDCl}_3$ , TMS)  $\delta$  (ppm) 2.90 (s, 3H), 7.39-7.47 (m, 3H), 7.75-7.79 (m, 1H), 7.93-7.96 (m, 2H), 8.52 (d,  $J = 8.2$  Hz, 2H).  $^{13}\text{C}$  NMR (75MHz  $\text{CDCl}_3$ , TMS)  $\delta$  (ppm) 22.1, 123.1, 123.8, 124.9, 126.7, 128.5, 129.0, 129.7, 133.4, 136.4, 136.7, 150.0, 150.4, 158.9, 168.5.

**2,4-diphenylquinazoline** (Table 3, Entry 5)<sup>2</sup>

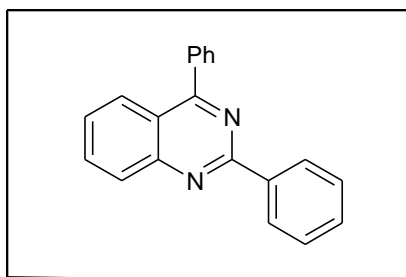

m.p. 117-119 °C. <sup>1</sup>H NMR (300MHz, CDCl<sub>3</sub>, TMS) δ (ppm) 7.45-7.54 (m, 4H), 7.54-7.61 (m, 3H), 7.84-7.89 (m, 3H), 8.09-8.18 (m, 2H), 8.65-8.71 (m, 2H). <sup>13</sup>C NMR (75MHz CDCl<sub>3</sub>, TMS) δ (ppm) 121.6, 126.8, 128.5, 128.8, 129.2, 129.8, 130.1, 130.5, 133.5, 137.7, 138.3, 152.1, 160.2, 168.3.

**2-(4-methoxyphenyl)-4-phenylquinazoline** (Table 3, Entry 6)<sup>2</sup>

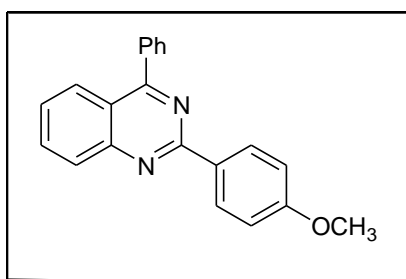

m.p. 158-161 °C. <sup>1</sup>H NMR (300MHz, CDCl<sub>3</sub>, TMS) δ (ppm) 3.89 (s, 3H), 7.02-7.07 (m, 2H), 7.35-7.42 (m, 1H), 7.51-7.60 (m, 4H), 7.82-7.89 (m, 4H), 8.10-8.17 (m, 2H). <sup>13</sup>C NMR (75MHz CDCl<sub>3</sub>, TMS) δ (ppm) 55.5, 113.9, 121.6, 126.2, 127.2, 128.4, 128.7, 129.9, 130.1, 130.2, 130.9, 133.8, 137.2, 150.5, 160.1, 161.7, 167.6.

**2-(4-fluorophenyl)-4-phenylquinazoline** (Table 3, Entry 7)<sup>2</sup>

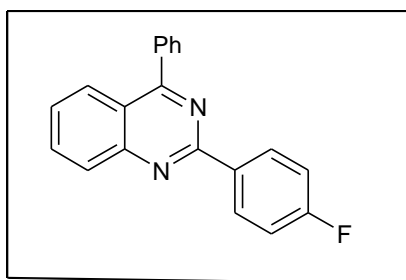

m.p. 154-156 °C. <sup>1</sup>H NMR (300MHz, CDCl<sub>3</sub>, TMS) δ (ppm) 7.50-7.54 (m, 3H), 7.59-7.63 (m, 3H), 7.78-7.89 (m, 3H), 8.09-8.12 (m, 2H), 8.68-8.71 (m, 2H). <sup>13</sup>C NMR (75MHz CDCl<sub>3</sub>, TMS) δ (ppm) 115.2, 115.6, 121.7, 126.4, 126.9, 128.6, 128.9, 129.9, 130.1, 130.6, 130.9, 133.4, 134.3, 134.9, 137.7, 152.3, 160.2, 163.1, 165.7, 168.0.

**2-(4-bromophenyl)-4-phenylquinazoline** (Table 3, Entry 8)<sup>2</sup>

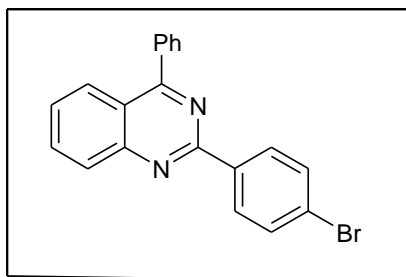

m.p. 141-144 °C. <sup>1</sup>H NMR (300MHz, CDCl<sub>3</sub>, TMS) δ (ppm) 7.45-7.59 (m, 4H), 7.70-7.79 (m, 4H), 7.86 (t, *J* = 8.4 Hz, 1H), 8.05 (d, *J* = 8.3 Hz, 1H), 8.15 (d, *J* = 8.4 Hz, 1H), 8.64-8.68 (m, 2H). <sup>13</sup>C NMR (75MHz CDCl<sub>3</sub>, TMS) δ (ppm) 121.4, 124.4, 126.4, 127.2, 128.3, 128.6, 129.3, 130.6, 131.8, 133.6, 134.4, 136.7, 137.9, 151.9, 160.3, 166.9.

**6-methoxy-2,4-diphenylquinazoline** (Table 3, Entry 9)<sup>1</sup>

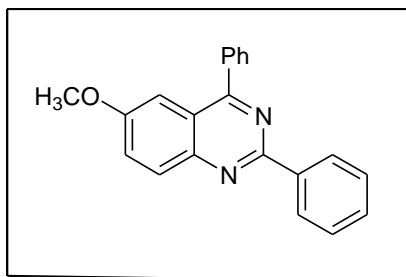

m.p. 169-175 °C. <sup>1</sup>H NMR (300MHz, CDCl<sub>3</sub>, TMS) δ (ppm) 3.89 (s, 3H), 7.03-7.10 (m, 2H), 7.35-7.42 (m, 1H), 7.52-7.57 (m, 4H), 7.81-7.87 (m, 4H), 8.16-8.20 (m, 2H). <sup>13</sup>C NMR (75MHz CDCl<sub>3</sub>, TMS) δ (ppm) 55.1, 113.1, 122.7, 125.9, 128.6, 129.1, 129.4, 129.9, 130.2, 130.7, 132.6, 133.9, 134.3, 139.2, 151.4, 160.4, 167.6.

**6,7-dimethoxy-2,4-diphenylquinazoline** (Table 3, Entry 10)<sup>2</sup>

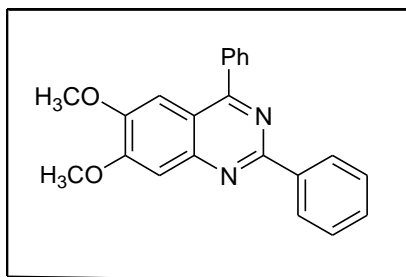

m.p. 179-184 °C.  $^1\text{H}$  NMR (300MHz,  $\text{CDCl}_3$ , TMS)  $\delta$  (ppm) 3.89 (s, 3H), 4.08(s, 3H), 7.32 (s, 1H), 7.45-7.51 (m, 4H), 7.57-7.61 (m, 3H), 7.85-7.88 (m, 2H), 8.60--8.64 (m, 2H).  $^{13}\text{C}$  NMR (75MHz  $\text{CDCl}_3$ , TMS)  $\delta$  (ppm) 55.3, 56.1, 104.3, 107.6, 117.1, 127.9, 128.6, 128.9, 129.6, 129.9, 130.2, 138.6, 139.1, 150.4, 151.4, 155.4, 160.5, 167.0

**6-chloro-2,4-diphenylquinazoline** (Table 3, Entry 11) <sup>2</sup>

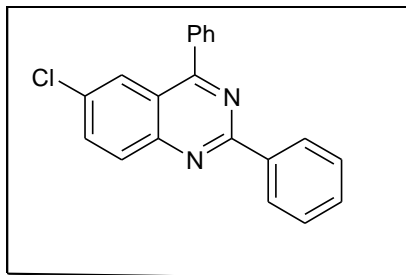

m.p. 198-203 °C.  $^1\text{H}$  NMR (300MHz,  $\text{CDCl}_3$ , TMS)  $\delta$  (ppm) 7.54-7.50 (m, 3H), 7.60-7.62 (m, 3H), 7.79-7.86 (m, 3H), 8.06-8.11 (m, 2H), 8.68-8.72 (m, 2H).  $^{13}\text{C}$  NMR (75MHz  $\text{CDCl}_3$ , TMS)  $\delta$  (ppm) 121.8, 125.9, 128.3, 128.9, 129.7, 130.2, 130.4, 130.9, 132.5, 133.2, 134.6, 136.9, 137.6, 150.7, 160.3, 167.9

**6-bromo-2,4-diphenylquinazoline** (Table 3, Entry 12) <sup>2</sup>

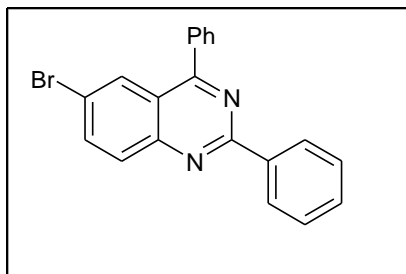

m.p. 209-212 °C.  $^1\text{H}$  NMR (300MHz,  $\text{CDCl}_3$ , TMS)  $\delta$  (ppm) 7.49-7.57 (m, 4H), 7.72-7.79 (m, 4H), 7.88 (t,  $J = 8.3$ , 1H), 8.04 (d,  $J = 8.4$  Hz, 1H), 8.16 (d,  $J = 8.4$  Hz, 1H), 8.63-8.68 (m, 2H).  $^{13}\text{C}$  NMR (75MHz  $\text{CDCl}_3$ , TMS)  $\delta$  (ppm) 121.2, 124.7, 126.5, 127.1, 128.5, 128.7, 129.3, 130.6, 131.9, 133.2, 136.5, 138.0, 151.0, 160.6, 167.5.

**6-nitro-2,4-diphenylquinazoline** (Table 3, Entry 13) <sup>1</sup>

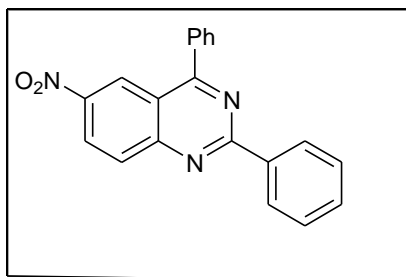

m.p. 215-217 °C. <sup>1</sup>H NMR (300MHz, CDCl<sub>3</sub>, TMS) δ (ppm) 7.25 (s, 1H), 7.51-7.52 (m, 3H), 7.65-7.68 (m, 3H), 7.91 (m, 2H), 8.21 (d, *J* = 9.5 Hz, 1H), 8.72-8.75 (m, 2H), 9.03 (s, 1H). <sup>13</sup>C NMR (75MHz CDCl<sub>3</sub>, TMS) δ (ppm) 123.9, 126.8, 128.7, 129.1, 129.2, 130.3, 130.6, 131.1, 131.7, 132.4, 150.8, 160.6, 167.9 .

## References

- [1] K. Karnakar, J. Shankar, S. Narayana Murthy, K. Ramesh and Y. V. D. Nageswar, *Synlett.*, 2011, 8, 1089.
- [2] J. Zhang, D. Zhu, C. Yu, C. Wan and Z. Wang, *Org. Lett.*, 2010, 12, 2841
